# Supplementary material for: Nanoarchitectonics of p-type BiSbTe with improved figure of merit via introducing PbTe nanoparticles
Source: Royal Society of Chemistry journal article supplement (doi:10.1039/d1ra07138f), 2021-01-01
Supplement: d1ra07138f1.pdf [file d1ra07138f1.pdf]

## Supporting Information

### **Nanoarchitectonics of p-type BiSbTe with improved figure of merit via introducing PbTe nanoparticles**

*Yuanyue Li<sup>a</sup>, Mengna Ren<sup>a</sup>, Zhongsen Sun<sup>a,\*</sup>, and Zhao Yao<sup>a,\*</sup>*

*<sup>a</sup>College of Electronic and Information Engineering, Qingdao University, Qingdao 266071, China*

---

\*Corresponding author: [sunzs@qdu.edu.cn](mailto:sunzs@qdu.edu.cn); [yao9074@hotmail.com](mailto:yao9074@hotmail.com)

**Fig. S1**

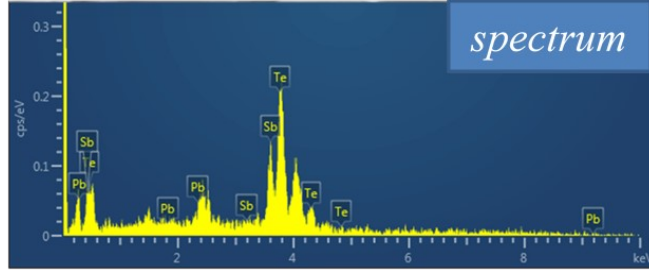

**Fig. S2**

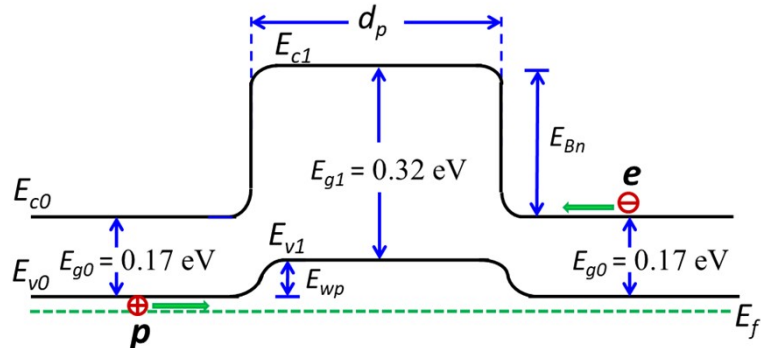

**Fig. S2** Schematic of energy bands for PbTe (band gap  $E_{g1}$ ) and BST (band gap  $E_{g0}$ ) as well as heterojunction potentials (where  $E_{C0}$  and  $E_{C1}$  are conduction band bottoms;  $E_{V0}$  and  $E_{V1}$  are valence band tops).

**Table S1**

List of the relative density  $d_r$  and the Lorenz number  $L$  at room temperature for  $\chi(\text{PbTe})/\text{BST}$  ( $\chi = 0, 0.25, 0.5$  and  $1.0$  wt.%).

| $\chi(\text{wt.}\%)$ | $d_r(\%)^a$ | $L^b$ |
|----------------------|-------------|-------|
| 0                    | 97          | 1.46  |
| 0.25                 | 97          | 1.51  |
| 0.5                  | 96          | 1.55  |
| 1                    | 98          | 1.59  |

<sup>a</sup> $d_r$  is relative density, defined as  $d_r = d/d_0$ , where  $d$  is measured density and  $d_0 (= 6.76\text{g/cm}^3)$  is theoretical density of BST. For the composite samples  $\chi(\text{PbTe})/\text{BST}$ , its theoretical density is modified as:  $d_0 = (1-f)d_1 + fd_2$ , here  $d_1 = d_0$  for BST and  $d_2 (= 8.15\text{ g/cm}^3)$  is theoretical density of PbTe.

<sup>b</sup> $L$  is the Lorenz number.

**Table S2**

Parameters for the calculation of lattice thermal conductivity by using Callaway model

| Line               | A<br>( $10^{-40} \text{ S}^3$ ) | B<br>( $10^{-18} \text{ s/K}$ ) | C<br>( $10^{-16} \text{ s}$ ) | <i>l</i><br>(nm) |
|--------------------|---------------------------------|---------------------------------|-------------------------------|------------------|
| <b>orange line</b> | 0.69                            | 9.92                            | 1.94                          | -                |
| <b>purple line</b> | 0.69                            | 9.92                            | 1.94                          | 126              |
| <b>wine line</b>   | 1.41                            | 9.92                            | 1.94                          | 126              |
